# Supplementary material for: Validity of a simplified screening instrument for assessing overweight children in a dental setting: a cross sectional study
Source: Springer Nature journal article supplement (doi:10.1186/s12887-017-0808-x), 2017-02-17
Supplement: MOESM1 [file 12074610]

**Table S1** Screening weights for overweight in girls based on age and 2007 WHO Reference height percentiles and BMI

| Age (years) | BMI (z-scores + 1 SD) |         | Height percentiles (cm)/ screening weight (kg; bold numbers) |             |             |             |             |             |             |              |              |             |             |
|-------------|-----------------------|---------|--------------------------------------------------------------|-------------|-------------|-------------|-------------|-------------|-------------|--------------|--------------|-------------|-------------|
|             |                       |         | 1% Ht                                                        | 3% Ht       | 5% Ht       | 15% Ht      | 25% Ht      | 50% Ht      | 75% Ht      | 85% Ht       | 95% Ht       | 97% Ht      | 99% Ht      |
| 5*          | 16.9                  | Ht (cm) | 98.5                                                         | 100.6       | 101.8       | 104.7       | 106.4       | 109.6       | 112.8       | 114.5        | 117.5        | 118.6       | 120.7       |
|             |                       | Wt (kg) | <b>16.4</b>                                                  | <b>17.1</b> | <b>17.5</b> | <b>18.5</b> | <b>19.1</b> | <b>20.3</b> | <b>21.5</b> | <b>22.1</b>  | <b>23.3</b>  | <b>23.7</b> | <b>24.6</b> |
| 5.5         | 16.9                  | Ht (cm) | 100.7                                                        | 102.9       | 104.1       | 107.1       | 108.8       | 112.2       | 115.5       | 117.3        | 120.3        | 121.5       | 123.7       |
|             |                       | Wt (kg) | <b>17.2</b>                                                  | <b>17.9</b> | <b>18.3</b> | <b>19.4</b> | <b>20.1</b> | <b>21.3</b> | <b>22.6</b> | <b>23.3</b>  | <b>24.5</b>  | <b>25</b>   | <b>25.9</b> |
| 6           | 17                    | Ht (cm) | 103.2                                                        | 105.5       | 106.7       | 109.8       | 111.7       | 115.1       | 118.6       | 120.4        | 123.5        | 124.8       | 127         |
|             |                       | Wt (kg) | <b>18.1</b>                                                  | <b>18.9</b> | <b>19.4</b> | <b>20.5</b> | <b>21.2</b> | <b>22.6</b> | <b>23.9</b> | <b>24.7</b>  | <b>26</b>    | <b>26.5</b> | <b>27.5</b> |
| 6.5         | 17.1                  | Ht (cm) | 105.7                                                        | 108         | 109.3       | 112.5       | 114.4       | 118         | 121.5       | <b>123.5</b> | <b>126.7</b> | 127.9       | 130.3       |
|             |                       | Wt (kg) | <b>19.1</b>                                                  | <b>20</b>   | <b>20.5</b> | <b>21.7</b> | <b>22.4</b> | <b>23.8</b> | <b>25.3</b> | <b>26.1</b>  | <b>27.5</b>  | <b>28</b>   | <b>29.1</b> |
| 7           | 17.3                  | Ht (cm) | 108.1                                                        | 110.5       | 111.8       | 115.1       | 117.1       | 120.8       | 124.5       | 126.5        | 129.8        | 131.1       | 133.5       |
|             |                       | Wt (kg) | <b>20.2</b>                                                  | <b>21.1</b> | <b>21.6</b> | <b>22.9</b> | <b>23.7</b> | <b>25.2</b> | <b>26.8</b> | <b>27.7</b>  | <b>29.1</b>  | <b>29.7</b> | <b>30.8</b> |
| 7.5         | 17.5                  | Ht (cm) | 110.6                                                        | 113.1       | 114.4       | 117.8       | 119.9       | 123.7       | 127.5       | 129.5        | 132.9        | 134.3       | 136.8       |
|             |                       | Wt (kg) | <b>21.4</b>                                                  | <b>22.4</b> | <b>22.9</b> | <b>24.3</b> | <b>25.1</b> | <b>26.7</b> | <b>28.4</b> | <b>29.3</b>  | <b>30.9</b>  | <b>31.5</b> | <b>32.7</b> |
| 8           | 17.7                  | Ht (cm) | 113.1                                                        | 115.7       | 117         | 120.5       | 122.6       | 126.6       | 130.5       | 132.6        | 136.1        | 137.5       | 140         |
|             |                       | Wt (kg) | <b>22.7</b>                                                  | <b>23.7</b> | <b>24.3</b> | <b>25.8</b> | <b>26.7</b> | <b>28.4</b> | <b>30.2</b> | <b>31.2</b>  | <b>32.8</b>  | <b>33.5</b> | <b>34.8</b> |
| 8.5         | 18                    | Ht (cm) | 115.6                                                        | 118.3       | 119.7       | 123.3       | 125.5       | 129.5       | 133.5       | 135.7        | 139.3        | 140.7       | 143.4       |
|             |                       | Wt (kg) | <b>24.1</b>                                                  | <b>25.2</b> | <b>25.8</b> | <b>27.4</b> | <b>28.4</b> | <b>30.2</b> | <b>32.1</b> | <b>33.2</b>  | <b>35</b>    | <b>35.7</b> | <b>37</b>   |
| 9           | 18.3                  | Ht (cm) | 118.3                                                        | 121         | 122.4       | 126.2       | 128.4       | 132.5       | 136.6       | 138.8        | 142.5        | 144         | 146.7       |
|             |                       | Wt (kg) | <b>25.6</b>                                                  | <b>26.8</b> | <b>27.5</b> | <b>29.2</b> | <b>30.2</b> | <b>32.2</b> | <b>34.2</b> | <b>35.3</b>  | <b>37.2</b>  | <b>38</b>   | <b>39.4</b> |
| 9.5         | 18.7                  | Ht (cm) | 121                                                          | 123.8       | 125.2       | 129.1       | 131.3       | 135.5       | 139.8       | 142          | 145.8        | 147.3       | 150.1       |
|             |                       | Wt (kg) | <b>27.3</b>                                                  | <b>28.6</b> | <b>29.3</b> | <b>31.1</b> | <b>32.2</b> | <b>34.3</b> | <b>36.5</b> | <b>37.7</b>  | <b>39.7</b>  | <b>40.5</b> | <b>42.1</b> |
| 10          | 19                    | Ht (cm) | 123.8                                                        | 126.6       | 128.1       | 132         | 134.3       | 138.6       | 143         | 145.3        | 149.2        | 150.7       | 153.5       |
|             |                       | Wt (kg) | <b>29.2</b>                                                  | <b>30.5</b> | <b>31.2</b> | <b>33.2</b> | <b>34.3</b> | <b>36.6</b> | <b>38.9</b> | <b>40.2</b>  | <b>42.3</b>  | <b>43.2</b> | <b>44.9</b> |
| 10.5        | 19.4                  | Ht (cm) | 126.6                                                        | 129.5       | 131.1       | 135         | 137.4       | 141.8       | 146.2       | 148.6        | 152.5        | 154.1       | 157         |
|             |                       | Wt (kg) | <b>31.1</b>                                                  | <b>32.6</b> | <b>33.4</b> | <b>35.4</b> | <b>36.7</b> | <b>39.1</b> | <b>41.5</b> | <b>42.9</b>  | <b>45.2</b>  | <b>46.1</b> | <b>47.9</b> |
| 11          | 19.9                  | Ht (cm) | 129.5                                                        | 132.5       | 134.1       | 138.1       | 140.5       | 145         | 149.5       | 151.9        | 155.9        | 157.5       | 160.5       |
|             |                       | Wt (kg) | <b>33.3</b>                                                  | <b>34.9</b> | <b>35.7</b> | <b>37.9</b> | <b>39.2</b> | <b>41.8</b> | <b>44.4</b> | <b>45.8</b>  | <b>48.3</b>  | <b>49.3</b> | <b>51.1</b> |
| 11.5        | 20.3                  | Ht (cm) | 132.5                                                        | 135.5       | 137.1       | 141.2       | 143.6       | 148.2       | 152.7       | 155.2        | 159.3        | 160.9       | 163.9       |
|             |                       | Wt (kg) | <b>35.7</b>                                                  | <b>37.3</b> | <b>38.2</b> | <b>40.5</b> | <b>41.9</b> | <b>44.6</b> | <b>47.4</b> | <b>48.9</b>  | <b>51.6</b>  | <b>52.6</b> | <b>54.6</b> |
| 12          | 20.8                  | Ht (cm) | 135.3                                                        | 138.4       | 140         | 144.1       | 146.6       | 151.2       | 155.8       | 158.3        | 162.5        | 164.1       | 167.1       |
|             |                       | Wt (kg) | <b>38.1</b>                                                  | <b>39.8</b> | <b>40.8</b> | <b>43.2</b> | <b>44.7</b> | <b>47.6</b> | <b>50.5</b> | <b>52.2</b>  | <b>54.9</b>  | <b>56</b>   | <b>58.1</b> |
| 12.5        | 21.3                  | Ht (cm) | 137.9                                                        | 141         | 142.6       | 146.8       | 149.3       | 154         | 158.7       | 161.2        | 165.4        | 167         | 170.1       |
|             |                       | Wt (kg) | <b>40.5</b>                                                  | <b>42.4</b> | <b>43.4</b> | <b>45.9</b> | <b>47.5</b> | <b>50.5</b> | <b>53.6</b> | <b>55.3</b>  | <b>58.3</b>  | <b>59.4</b> | <b>61.6</b> |

| Age<br>(years) | BMI<br>(z-scores + 1 SD) |         | Height percentiles (cm)/ screening weight (kg; bold numbers) |             |             |             |             |             |             |             |             |             |             |
|----------------|--------------------------|---------|--------------------------------------------------------------|-------------|-------------|-------------|-------------|-------------|-------------|-------------|-------------|-------------|-------------|
|                |                          |         | 1% Ht                                                        | 3% Ht       | 5% Ht       | 15% Ht      | 25% Ht      | 50% Ht      | 75% Ht      | 85% Ht      | 95% Ht      | 97% Ht      | 99% Ht      |
| 13             | 21.8                     | Ht (cm) | 140.2                                                        | 143.3       | 145         | 149.2       | 151.7       | 156.4       | 161.1       | 163.6       | 167.8       | 169.4       | 172.5       |
|                |                          | Wt (kg) | <b>42.9</b>                                                  | <b>44.8</b> | <b>45.8</b> | <b>48.5</b> | <b>50.2</b> | <b>53.3</b> | <b>56.6</b> | <b>58.3</b> | <b>61.4</b> | <b>62.6</b> | <b>64.9</b> |
| 13.5           | 22.3                     | Ht (cm) | 142.1                                                        | 145.2       | 146.9       | 151.1       | 153.6       | 158.3       | 163         | 165.5       | 169.7       | 171.4       | 174.5       |
|                |                          | Wt (kg) | <b>45</b>                                                    | <b>47</b>   | <b>48.1</b> | <b>50.9</b> | <b>52.6</b> | <b>55.8</b> | <b>59.2</b> | <b>61</b>   | <b>64.2</b> | <b>65.4</b> | <b>67.8</b> |
| 14             | 22.7                     | Ht (cm) | 143.6                                                        | 146.7       | 148.4       | 152.6       | 155.1       | 159.8       | 164.5       | 167         | 171.2       | 172.8       | 175.9       |
|                |                          | Wt (kg) | <b>46.9</b>                                                  | <b>48.9</b> | <b>50</b>   | <b>52.9</b> | <b>54.7</b> | <b>58</b>   | <b>61.5</b> | <b>63.4</b> | <b>66.6</b> | <b>67.9</b> | <b>70.4</b> |
| 14.5           | 23.1                     | Ht (cm) | 144.8                                                        | 147.9       | 149.5       | 153.7       | 156.2       | 160.9       | 165.6       | 168.1       | 172.3       | 173.9       | 177         |
|                |                          | Wt (kg) | <b>48.5</b>                                                  | <b>50.6</b> | <b>51.7</b> | <b>54.7</b> | <b>56.5</b> | <b>59.9</b> | <b>63.4</b> | <b>65.4</b> | <b>68.7</b> | <b>70</b>   | <b>72.5</b> |
| 15             | 23.5                     | Ht (cm) | 145.7                                                        | 148.7       | 150.4       | 154.5       | 157         | 161.7       | 166.3       | 168.8       | 173         | 174.6       | 177.7       |
|                |                          | Wt (kg) | <b>49.9</b>                                                  | <b>52</b>   | <b>53.2</b> | <b>56.2</b> | <b>58</b>   | <b>61.5</b> | <b>65</b>   | <b>67</b>   | <b>70.4</b> | <b>71.7</b> | <b>74.2</b> |
| 15.5           | 23.8                     | Ht (cm) | 146.3                                                        | 149.3       | 150.9       | 155.1       | 157.6       | 162.2       | 166.8       | 169.3       | 173.4       | 175         | 178.1       |
|                |                          | Wt (kg) | <b>51</b>                                                    | <b>53.2</b> | <b>54.3</b> | <b>57.3</b> | <b>59.2</b> | <b>62.7</b> | <b>66.3</b> | <b>68.3</b> | <b>71.7</b> | <b>73</b>   | <b>75.6</b> |
| 16             | 24.1                     | Ht (cm) | 146.7                                                        | 149.8       | 151.4       | 155.5       | 157.9       | 162.5       | 167.1       | 169.6       | 173.7       | 175.3       | 178.3       |
|                |                          | Wt (kg) | 51.9                                                         | 54.1        | 55.2        | 58.3        | 60.1        | 63.7        | 67.3        | 69.3        | 72.7        | 74.1        | 76.6        |
| 16.5           | 24.3                     | Ht (cm) | 147                                                          | 150         | 151.6       | 155.7       | 158.2       | 162.7       | 167.3       | 169.7       | 173.8       | 175.4       | 178.4       |
|                |                          | Wt (kg) | <b>52.6</b>                                                  | <b>54.8</b> | <b>55.9</b> | <b>59</b>   | <b>60.9</b> | <b>64.4</b> | <b>68.1</b> | <b>70.1</b> | <b>73.5</b> | <b>74.8</b> | <b>77.4</b> |
| 17             | 24.5                     | Ht (cm) | 147.3                                                        | 150.3       | 151.8       | 155.9       | 158.3       | 162.9       | 167.4       | 169.8       | 173.9       | 175.4       | 178.4       |
|                |                          | Wt (kg) | <b>53.2</b>                                                  | <b>55.3</b> | <b>56.5</b> | <b>59.6</b> | <b>61.4</b> | <b>65</b>   | <b>68.6</b> | <b>70.6</b> | <b>74.1</b> | <b>75.4</b> | <b>78</b>   |
| 17.5           | 24.6                     | Ht (cm) | 147.5                                                        | 150.5       | 152         | 156.1       | 158.5       | 163         | 167.5       | 169.9       | 173.9       | 175.5       | 178.4       |
|                |                          | Wt (kg) | <b>53.6</b>                                                  | <b>55.8</b> | <b>57</b>   | <b>60</b>   | <b>61.9</b> | <b>65.5</b> | <b>69.1</b> | <b>71.1</b> | <b>74.5</b> | <b>75.9</b> | <b>78.5</b> |
| 18             | 24.8                     | Ht (cm) | 147.7                                                        | 150.6       | 152.2       | 156.2       | 158.6       | 163.1       | 167.5       | 169.9       | 173.9       | 175.5       | 178.4       |
|                |                          | Wt (kg) | <b>54</b>                                                    | <b>56.2</b> | <b>57.4</b> | <b>60.4</b> | <b>62.3</b> | <b>65.9</b> | <b>69.5</b> | <b>71.5</b> | <b>74.9</b> | <b>76.3</b> | <b>78.9</b> |
| 18.5           | 24.9                     | Ht (cm) | 147.8                                                        | 150.8       | 152.3       | 156.3       | 158.7       | 163.1       | 167.6       | 169.9       | 173.9       | 175.5       | 178.4       |
|                |                          | Wt (kg) | <b>54.4</b>                                                  | <b>56.5</b> | <b>57.7</b> | <b>60.8</b> | <b>62.6</b> | <b>66.2</b> | <b>69.8</b> | <b>71.8</b> | <b>75.3</b> | <b>76.6</b> | <b>79.2</b> |
| 19             | 25                       | Ht (cm) | 147.9                                                        | 150.9       | 152.4       | 156.4       | 158.7       | 163.2       | 167.6       | 169.9       | 173.9       | 175.5       | 178.4       |
|                |                          | Wt (kg) | <b>54.6</b>                                                  | <b>56.8</b> | <b>58</b>   | <b>61.1</b> | <b>62.9</b> | <b>66.5</b> | <b>70.1</b> | <b>72.1</b> | <b>75.5</b> | <b>76.9</b> | <b>79.4</b> |

\*Values of BMI and height are for 61 months of age. Ht: Height; Wt: Weight, SD: Standard Deviation;

The highlighted cells present an assessment for a 6-year-8-month-old girl, whose height and weight are, respectively, 124 cm and 29 kg.

Step 1: This girl's age (6 years and 8 months) is between the rows 6.5 years and 7 years.

Step 2: In the row 6.5 years, the girl's height (124cm) is between the columns 123.5 cm and 126.7 cm.

Step 3: The screening weight for 126.7 cm is 27.5 kg.

Step 4: The girl's weight (29kg) is more this screening unit grid of 27.5 kg. Therefore; this girl is overweight

Note: Computation of individual BMI will be required for cases with height/weight values that occur between tabular values with inability for clear delineation.

**Table S2** Screening weights for overweight in boys based upon age and 2007 WHO Reference height percentiles and BMI

| Age (years) | BMI (z-scores + 1 SD) |         | Height percentiles (cm)/ screening weight (kg; bold numbers) |             |             |             |             |             |             |              |              |             |             |
|-------------|-----------------------|---------|--------------------------------------------------------------|-------------|-------------|-------------|-------------|-------------|-------------|--------------|--------------|-------------|-------------|
|             |                       |         | 1% Ht                                                        | 3% Ht       | 5% Ht       | 15% Ht      | 25% Ht      | 50% Ht      | 75% Ht      | 85% Ht       | 95% Ht       | 97% Ht      | 99% Ht      |
| 5*          | 16.6                  | Ht (cm) | 99.6                                                         | 101.6       | 102.7       | 105.5       | 107.2       | 110.3       | 113.4       | 115          | 117.8        | 118.9       | 120.9       |
|             |                       | Wt (kg) | <b>16.5</b>                                                  | <b>17.2</b> | <b>17.6</b> | <b>18.5</b> | <b>19.1</b> | <b>20.2</b> | <b>21.4</b> | <b>22</b>    | <b>23.1</b>  | <b>23.5</b> | <b>24.4</b> |
| 5.5         | 16.7                  | Ht (cm) | 101.9                                                        | 104         | 105.1       | 108         | 109.7       | 112.9       | 116.1       | 117.8        | 120.7        | 121.8       | 124         |
|             |                       | Wt (kg) | <b>17.3</b>                                                  | <b>18</b>   | <b>18.4</b> | <b>19.5</b> | <b>20.1</b> | <b>21.3</b> | <b>22.5</b> | <b>23.2</b>  | <b>24.3</b>  | <b>24.8</b> | <b>25.6</b> |
| 6           | 16.8                  | Ht (cm) | 104.5                                                        | 106.7       | 107.8       | 110.8       | 112.6       | 116         | 119.3       | 121.1        | 124.1        | 125.2       | 127.4       |
|             |                       | Wt (kg) | <b>18.3</b>                                                  | <b>19.1</b> | <b>19.5</b> | <b>20.6</b> | <b>21.3</b> | <b>22.5</b> | <b>23.8</b> | <b>24.6</b>  | <b>25.8</b>  | <b>26.3</b> | <b>27.2</b> |
| 6.5         | 16.9                  | Ht (cm) | 107                                                          | 109.3       | 110.5       | 113.6       | 115.4       | 118.9       | 122.3       | 124.2        | 127.3        | 128.5       | 130.7       |
|             |                       | Wt (kg) | <b>19.3</b>                                                  | <b>20.2</b> | <b>20.6</b> | <b>21.8</b> | <b>22.5</b> | <b>23.9</b> | <b>25.3</b> | <b>26</b>    | <b>27.4</b>  | <b>27.9</b> | <b>28.9</b> |
| 7           | 17                    | Ht (cm) | 109.4                                                        | 111.8       | 113         | 116.3       | 118.2       | 121.7       | 125.3       | 127.2        | 130.4        | 131.7       | 134         |
|             |                       | Wt (kg) | <b>20.4</b>                                                  | <b>21.3</b> | <b>21.8</b> | <b>23</b>   | <b>23.8</b> | <b>25.3</b> | <b>26.8</b> | <b>27.6</b>  | <b>29</b>    | <b>29.6</b> | <b>30.6</b> |
| 7.5         | 17.2                  | Ht (cm) | 111.8                                                        | 114.3       | 115.5       | 118.9       | 120.8       | 124.5       | 128.2       | 130.2        | 133.5        | 134.8       | 137.3       |
|             |                       | Wt (kg) | <b>21.5</b>                                                  | <b>22.5</b> | <b>23</b>   | <b>24.4</b> | <b>25.2</b> | <b>26.7</b> | <b>28.3</b> | <b>29.2</b>  | <b>30.7</b>  | <b>31.3</b> | <b>32.5</b> |
| 8           | 17.4                  | Ht (cm) | 114.1                                                        | 116.6       | 118         | 121.4       | 123.5       | 127.3       | 131.1       | 133.1        | 136.6        | 137.9       | 140.4       |
|             |                       | Wt (kg) | <b>22.7</b>                                                  | <b>23.7</b> | <b>24.3</b> | <b>25.7</b> | <b>26.6</b> | <b>28.2</b> | <b>30</b>   | <b>30.9</b>  | <b>32.5</b>  | <b>33.2</b> | <b>34.4</b> |
| 8.5         | 17.7                  | Ht (cm) | 116.4                                                        | 119         | 120.3       | 123.9       | 126         | 129.9       | 133.9       | 136          | 139.5        | 140.9       | 143.5       |
|             |                       | Wt (kg) | <b>23.9</b>                                                  | <b>25</b>   | <b>25.6</b> | <b>27.1</b> | <b>28</b>   | <b>29.8</b> | <b>31.7</b> | <b>32.7</b>  | <b>34.4</b>  | <b>35.1</b> | <b>36.4</b> |
| 9           | 17.9                  | Ht (cm) | 118.6                                                        | 121.3       | 122.7       | 126.3       | 128.5       | 132.6       | 136.6       | 138.8        | 142.5        | 143.9       | 146.6       |
|             |                       | Wt (kg) | <b>25.2</b>                                                  | <b>26.3</b> | <b>27</b>   | <b>28.6</b> | <b>29.6</b> | <b>31.5</b> | <b>33.4</b> | <b>34.5</b>  | <b>36.3</b>  | <b>37.1</b> | <b>38.5</b> |
| 9.5         | 18.2                  | Ht (cm) | 120.8                                                        | 123.5       | 125         | 128.8       | 131         | 135.2       | 139.4       | <b>141.6</b> | <b>145.4</b> | 146.8       | 149.6       |
|             |                       | Wt (kg) | <b>26.5</b>                                                  | <b>27.7</b> | <b>28.4</b> | <b>30.1</b> | <b>31.2</b> | <b>33.2</b> | <b>35.3</b> | <b>36.5</b>  | <b>38.4</b>  | <b>39.2</b> | <b>40.7</b> |
| 10          | 18.5                  | Ht (cm) | 123                                                          | 125.8       | 127.3       | 131.2       | 133.5       | 137.8       | 142.1       | 144.4        | 148.3        | 149.8       | 152.6       |
|             |                       | Wt (kg) | <b>27.9</b>                                                  | <b>29.2</b> | <b>30</b>   | <b>31.8</b> | <b>32.9</b> | <b>35.1</b> | <b>37.3</b> | <b>38.5</b>  | <b>40.6</b>  | <b>41.5</b> | <b>43</b>   |
| 10.5        | 18.8                  | Ht (cm) | 125.2                                                        | 128.1       | 129.6       | 133.6       | 136         | 140.4       | 144.8       | 147.2        | 151.2        | 152.7       | 155.6       |
|             |                       | Wt (kg) | <b>29.5</b>                                                  | <b>30.9</b> | <b>31.6</b> | <b>33.6</b> | <b>34.8</b> | <b>37.1</b> | <b>39.4</b> | <b>40.8</b>  | <b>43</b>    | <b>43.9</b> | <b>45.6</b> |
| 11          | 19.2                  | Ht (cm) | 127.5                                                        | 130.5       | 132         | 136.1       | 138.6       | 143.1       | 147.7       | 150.1        | 154.2        | 155.8       | 158.8       |
|             |                       | Wt (kg) | <b>31.1</b>                                                  | <b>32.6</b> | <b>33.4</b> | <b>35.5</b> | <b>36.8</b> | <b>39.3</b> | <b>41.8</b> | <b>43.2</b>  | <b>45.6</b>  | <b>46.5</b> | <b>48.3</b> |
| 11.5        | 19.5                  | Ht (cm) | 129.9                                                        | 133         | 134.6       | 138.8       | 141.3       | 146         | 150.6       | 153.1        | 157.4        | 159         | 162.1       |
|             |                       | Wt (kg) | <b>33</b>                                                    | <b>34.6</b> | <b>35.4</b> | <b>37.7</b> | <b>39</b>   | <b>41.7</b> | <b>44.4</b> | <b>45.8</b>  | <b>48.4</b>  | <b>49.4</b> | <b>51.3</b> |
| 12          | 19.9                  | Ht (cm) | 132.6                                                        | 135.8       | 137.4       | 141.7       | 144.3       | 149.1       | 153.9       | 156.4        | 160.7        | 162.4       | 165.6       |
|             |                       | Wt (kg) | <b>35.1</b>                                                  | <b>36.8</b> | <b>37.7</b> | <b>40.1</b> | <b>41.5</b> | <b>44.3</b> | <b>47.2</b> | <b>48.8</b>  | <b>51.5</b>  | <b>52.6</b> | <b>54.7</b> |
| 12.5        | 20.4                  | Ht (cm) | 135.6                                                        | 138.8       | 140.5       | 144.9       | 147.5       | 152.4       | 157.3       | 160          | 164.4        | 166.1       | 169.3       |
|             |                       | Wt (kg) | <b>37.4</b>                                                  | <b>39.3</b> | <b>40.2</b> | <b>42.8</b> | <b>44.4</b> | <b>47.4</b> | <b>50.4</b> | <b>52.1</b>  | <b>55.1</b>  | <b>56.2</b> | <b>58.4</b> |
| 13          | 20.8                  | Ht (cm) | 138.8                                                        | 142.1       | 143.8       | 148.3       | 151         | 156         | 161.1       | 163.7        | 168.3        | 170         | 173.3       |
|             |                       | Wt (kg) | <b>40.1</b>                                                  | <b>42</b>   | <b>43.1</b> | <b>45.8</b> | <b>47.5</b> | <b>50.7</b> | <b>54</b>   | <b>55.8</b>  | <b>59</b>    | <b>60.2</b> | <b>62.6</b> |

| Age<br>(years) | BMI<br>(z-scores + 1 SD) | Height percentiles (cm)/ screening weight (kg; bold numbers) |             |             |             |             |             |             |             |             |             |             |             |
|----------------|--------------------------|--------------------------------------------------------------|-------------|-------------|-------------|-------------|-------------|-------------|-------------|-------------|-------------|-------------|-------------|
|                |                          | 1% Ht                                                        | 3% Ht       | 5% Ht       | 15% Ht      | 25% Ht      | 50% Ht      | 75% Ht      | 85% Ht      | 95% Ht      | 97% Ht      | 99% Ht      |             |
| 13.5           | 21.3                     | Ht (cm)                                                      | 142.1       | 145.4       | 147.2       | 151.8       | 154.6       | 159.7       | 164.8       | 167.5       | 172.2       | 173.9       | 177.3       |
|                |                          | Wt (kg)                                                      | <b>43</b>   | <b>45.1</b> | <b>46.2</b> | <b>49.1</b> | <b>50.9</b> | <b>54.3</b> | <b>57.9</b> | <b>59.8</b> | <b>63.1</b> | <b>64.4</b> | <b>67</b>   |
| 14             | 21.8                     | Ht (cm)                                                      | 145.3       | 148.7       | 150.5       | 155.2       | 158         | 163.2       | 168.4       | 171.2       | 175.8       | 177.6       | 181.1       |
|                |                          | Wt (kg)                                                      | <b>46</b>   | <b>48.2</b> | <b>49.3</b> | <b>52.4</b> | <b>54.3</b> | <b>58</b>   | <b>61.7</b> | <b>63.8</b> | <b>67.3</b> | <b>68.7</b> | <b>71.4</b> |
| 14.5           | 22.2                     | Ht (cm)                                                      | 148.2       | 151.7       | 153.5       | 158.3       | 161.1       | 166.3       | 171.5       | 174.4       | 179.1       | 180.9       | 184.4       |
|                |                          | Wt (kg)                                                      | <b>48.9</b> | <b>51.2</b> | <b>52.4</b> | <b>55.7</b> | <b>57.7</b> | <b>61.5</b> | <b>65.4</b> | <b>67.6</b> | <b>71.3</b> | <b>72.8</b> | <b>75.6</b> |
| 15             | 22.7                     | Ht (cm)                                                      | 150.8       | 154.3       | 156.1       | 160.9       | 163.7       | 169         | 174.2       | 177         | 181.8       | 183.6       | 187.1       |
|                |                          | Wt (kg)                                                      | <b>51.6</b> | <b>54</b>   | <b>55.3</b> | <b>58.7</b> | <b>60.8</b> | <b>64.8</b> | <b>68.9</b> | <b>71.1</b> | <b>75</b>   | <b>76.5</b> | <b>79.4</b> |
| 15.5           | 23.1                     | Ht (cm)                                                      | 153         | 156.5       | 158.3       | 163.1       | 165.9       | 171.1       | 176.4       | 179.2       | 184         | 185.8       | 189.3       |
|                |                          | Wt (kg)                                                      | <b>54.1</b> | <b>56.6</b> | <b>57.9</b> | <b>61.5</b> | <b>63.6</b> | <b>67.7</b> | <b>71.9</b> | <b>74.3</b> | <b>78.3</b> | <b>79.8</b> | <b>82.8</b> |
| 16             | 23.5                     | Ht (cm)                                                      | 154.8       | 158.3       | 160.1       | 164.8       | 167.7       | 172.9       | 178.1       | 181         | 185.7       | 187.5       | 191         |
|                |                          | Wt (kg)                                                      | <b>56.4</b> | <b>58.9</b> | <b>60.3</b> | <b>63.9</b> | <b>66.1</b> | <b>70.3</b> | <b>74.7</b> | <b>77</b>   | <b>81.1</b> | <b>82.7</b> | <b>85.8</b> |
| 16.5           | 23.9                     | Ht (cm)                                                      | 156.3       | 159.7       | 161.5       | 166.2       | 169         | 174.2       | 179.4       | 182.2       | 186.9       | 188.7       | 192.2       |
|                |                          | Wt (kg)                                                      | <b>58.4</b> | <b>61</b>   | <b>62.4</b> | <b>66.1</b> | <b>68.3</b> | <b>72.6</b> | <b>77</b>   | <b>79.4</b> | <b>83.5</b> | <b>85.2</b> | <b>88.3</b> |
| 17             | 24.3                     | Ht (cm)                                                      | 157.4       | 160.8       | 162.6       | 167.2       | 170         | 175.2       | 180.3       | 183.1       | 187.7       | 189.5       | 192.9       |
|                |                          | Wt (kg)                                                      | <b>60.1</b> | <b>62.7</b> | <b>64.2</b> | <b>67.9</b> | <b>70.1</b> | <b>74.5</b> | <b>78.9</b> | <b>81.4</b> | <b>85.5</b> | <b>87.2</b> | <b>90.4</b> |
| 17.5           | 24.6                     | Ht (cm)                                                      | 158.2       | 161.5       | 163.3       | 167.9       | 170.7       | 175.8       | 180.9       | 183.6       | 188.2       | 190         | 193.4       |
|                |                          | Wt (kg)                                                      | <b>61.6</b> | <b>64.2</b> | <b>65.6</b> | <b>69.4</b> | <b>71.7</b> | <b>76</b>   | <b>80.5</b> | <b>82.9</b> | <b>87.1</b> | <b>88.8</b> | <b>92</b>   |
| 18             | 24.9                     | Ht (cm)                                                      | 158.8       | 162.1       | 163.9       | 168.4       | 171.1       | 176.1       | 181.2       | 183.9       | 188.4       | 190.2       | 193.5       |
|                |                          | Wt (kg)                                                      | <b>62.8</b> | <b>65.5</b> | <b>66.9</b> | <b>70.7</b> | <b>72.9</b> | <b>77.3</b> | <b>81.8</b> | <b>84.2</b> | <b>88.5</b> | <b>90.1</b> | <b>93.3</b> |
| 18.5           | 25.2                     | Ht (cm)                                                      | 159.2       | 162.5       | 164.2       | 168.7       | 171.4       | 176.4       | 181.4       | 184         | 188.5       | 190.3       | 193.6       |
|                |                          | Wt (kg)                                                      | <b>63.9</b> | <b>66.5</b> | <b>68</b>   | <b>71.7</b> | <b>74</b>   | <b>78.4</b> | <b>82.9</b> | <b>85.3</b> | <b>89.5</b> | <b>91.2</b> | <b>94.4</b> |
| 19             | 25.4                     | Ht (cm)                                                      | 159.6       | 162.8       | 164.5       | 169         | 171.6       | 176.5       | 181.5       | 184.1       | 188.5       | 190.3       | 193.5       |
|                |                          | Wt (kg)                                                      | <b>64.8</b> | <b>67.5</b> | <b>68.9</b> | <b>72.7</b> | <b>75</b>   | <b>79.3</b> | <b>83.8</b> | <b>86.3</b> | <b>90.5</b> | <b>92.1</b> | <b>95.3</b> |

\*Values of BMI and height are for 61 months of age. Ht: Height; Wt: Weight, SD: Standard Deviation;

The highlighted cells present an assessment for a 9-year-8-month-old boy, whose height and weight are, respectively, 143 cm and 35 kg.

Step 1: This boy's age (9 years and 8 months) is between the rows 9.5 years and 10 years.

Step 2: In the row 9.5 years, the boy's height (143cm) is between the columns 141.6 cm and 145.4 cm.

Step 3: The screening weight for 141.6 cm is 36.5 kg.

Step 4: The boy's weight (35kg) is below this screening unit grid of 36.5 kg. Therefore; this boy is not overweight

Note: Computation of individual BMI will be required for cases with height/weight values that occur between tabular values with inability for clear delineation.
